# Supplementary material for: Characterization of the Gut Microbiota in Individuals with Overweight or Obesity during a Real-World Weight Loss Dietary Program: A Focus on the Bacteroides 2 Enterotype
Source: MDPI journal article supplement (doi:10.3390/biomedicines10010016), 2021-12-22

**a**

kruskal.test pvalue= 0.016 ; qvalue= 0.092

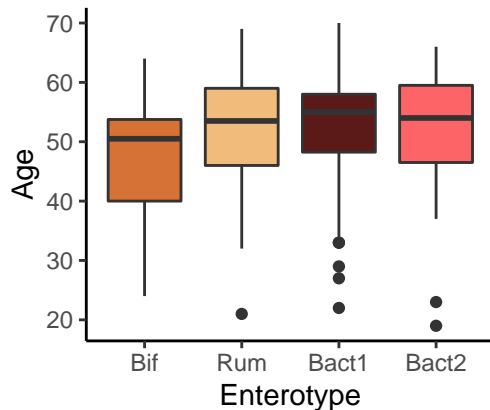**b**

chisq.test pvalue= 0.0069 ; qvalue= 0.052

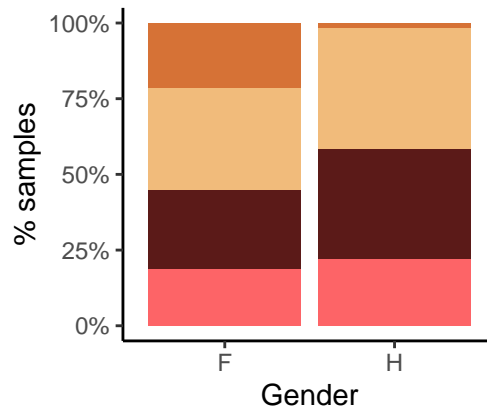**c**

chisq.test pvalue= 0.0027 ; qvalue= 0.04

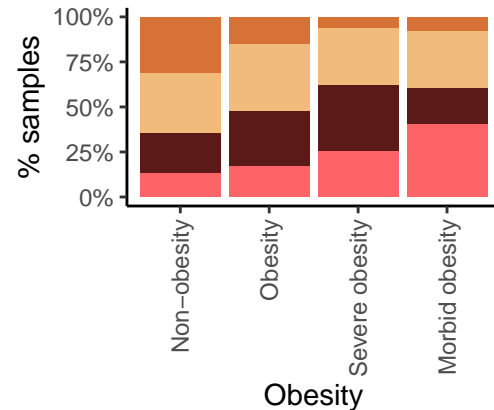**d**

kruskal.test pvalue= 0.0051 ; qvalue= 0.046

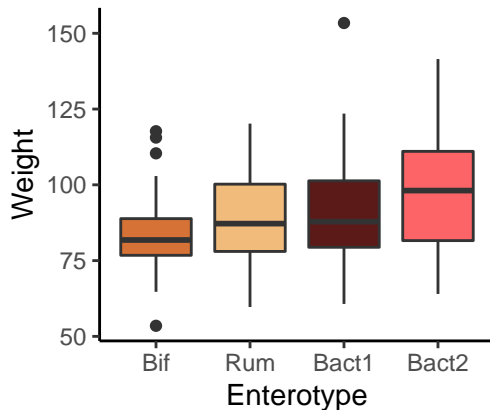**e**

kruskal.test pvalue= 0.002 ; qvalue= 0.04

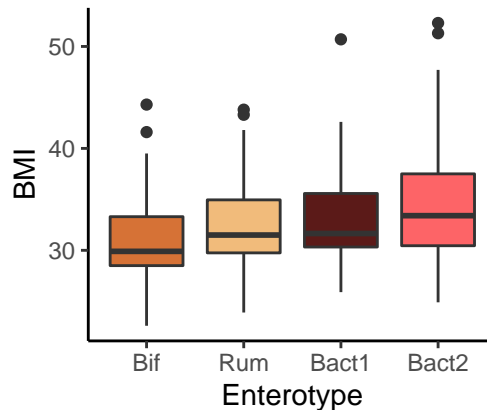**f**

kruskal.test pvalue= 0.0035 ; qvalue= 0.04

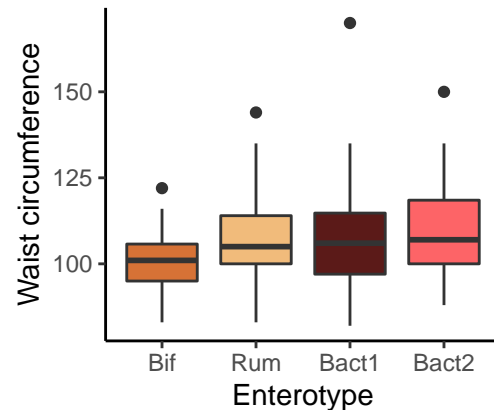**g**

kruskal.test pvalue= 0.013 ; qvalue= 0.083

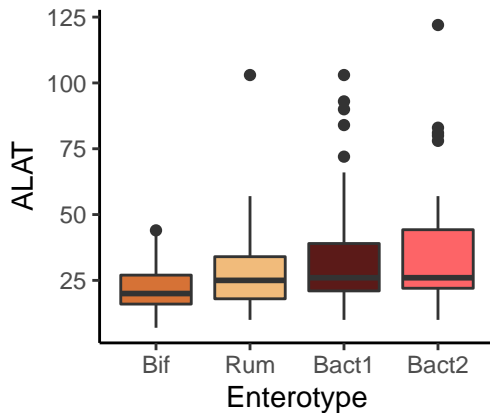**h**

chisq.test pvalue= 0.033 ; qvalue= 0.16

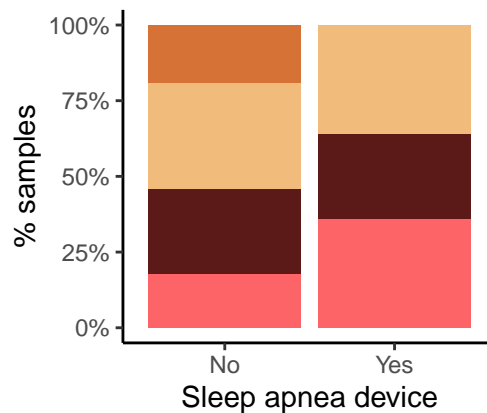

Supplement: s1 [file s1]
