# Supplementary material for: Characterization of the Gut Microbiota in Individuals with Overweight or Obesity during a Real-World Weight Loss Dietary Program: A Focus on the Bacteroides 2 Enterotype
Source: MDPI journal article supplement (doi:10.3390/biomedicines10010016), 2021-12-22
Supplement: s1 [file s1]

| Clinical parameters                    | no LMP<br>Before weight loss | no LMP<br>After weight loss (-10%) | <i>p</i> -value | LMP<br>Before weight loss | LMP<br>After weight loss (-10%) |
|----------------------------------------|------------------------------|------------------------------------|-----------------|---------------------------|---------------------------------|
| Sample size, n(%)                      | 47 (28.8)                    | -                                  | -               | 116 (71.2)                | -                               |
| Age (years)                            | 52.1 (9.1)                   | -                                  | -               | 50.3 (10.4)               | -                               |
| Sex (male), n (%)                      | 14 (29.8)                    | -                                  | -               | 17 (14.7)                 | -                               |
| Height (cm)                            | 166.7 (9.0)                  | -                                  | -               | 164.9 (7.3)               | -                               |
| SAS (Yes), n (%)                       | 7 (14.9)                     | -                                  | -               | 18 (15.5)                 | -                               |
| <b>Adiposity markers</b>               |                              |                                    |                 |                           |                                 |
| Weight (kg)                            | 91.8 (18.2)                  | 81.6 (16.2)                        | ****            | 89.8 (15.3)               | 80.0 (13.7)                     |
| BMI (kg/m²)                            | 32.9 (4.8)                   | 29.3 (4.3)                         | ****            | 33.0 (4.9)                | 29.4 (4.4)                      |
| Waist cirumferance (cm)                | 107.1 (13.8)                 | 95.8 (11.5)                        | ****            | 106.8 (12.0)              | 96.5 (11.8)                     |
| Fat mass (%)                           | 40.1 (4.0)                   | 37.0 (4.7)                         | ****            | 41.1 (4.5)                | 38.0 (5.1)                      |
| Fat-free mass (%)                      | 31.1 (6.4)                   | 32.1 (6.5)                         | ****            | 33.0 (8.9)                | 33.7 (8.0)                      |
| Calculated Basal metabolism (Kcal/day) | 2234 (366)                   | 2128 (358)                         | ****            | 2179 (278)                | 2061 (265)                      |
| <b>Plasma Glucose homeostasis</b>      |                              |                                    |                 |                           |                                 |
| Glycemia (g/l)                         | 1.08 (0.25)                  | 1.00 (0.14)                        | *               | 1.00 (0.16)               | 0.94 (0.10)                     |
| Insulinemia (mIU/L)                    | 17.1 (10.6)                  | 9.0 (6.2)                          | <i>na</i>       | 14.3 (7.2)                | 9.7 (7.3)                       |
| HOMA IR                                | 5.4 (4.6)                    | 2.4 (2.0)                          | <i>na</i>       | 3.9 (2.6)                 | 2.1 (1.9)                       |
| HbA1c (%)                              | 6.0 (0.9)                    | 5.6 (0.3)                          | *               | 5.7 (0.8)                 | 5.6 (0.6)                       |
| <b>Plasma lipid homeostasis</b>        |                              |                                    |                 |                           |                                 |
| Total cholesterol (nmol/L)             | 5.8 (1.0)                    | 5.1 (1.1)                          | ***             | 5.6 (1.1)                 | 5.1 (0.9)                       |
| Total triglycerides (nmol/L)           | 1.6 (0.9)                    | 1.0 (0.4)                          | ****            | 1.6 (0.8)                 | 1.1 (0.6)                       |
| HDL cholesterol (nmol/L)               | 1.4 (0.4)                    | 1.4 (0.3)                          | <i>ns</i>       | 1.4 (0.4)                 | 1.5 (0.4)                       |
| LDL cholesterol (nmol/L)               | 3.4 (0.8)                    | 3.3 (0.8)                          | **              | 3.5 (0.9)                 | 3.1 (0.8)                       |
| <b>Liver Enzymes</b>                   |                              |                                    |                 |                           |                                 |
| ASAT (IU/L)                            | 23.9 (9.5)                   | 22.5 (8.6)                         | <i>ns</i>       | 23.3 (7.7)                | 21.2 (6.9)                      |
| ALAT (IU/L)                            | 32.2 (19.4)                  | 26.8 (14.2)                        | *               | 28.5 (16.3)               | 23.2 (10.6)                     |
| GGT (IU/L)                             | 45.7 (33.4)                  | 22.6 (17.2)                        | **              | 39.2 (41.0)               | 33.7 (42.9)                     |
| <b>Other variables</b>                 |                              |                                    |                 |                           |                                 |
| Creatinine (mg/L)                      | 8.1 (1.5)                    | 8.1 (1.4)                          | <i>ns</i>       | 8.2 (1.4)                 | 8.3 (1.4)                       |
| Uricemia (mg/L)                        | 54.9 (12.4)                  | 50.2 (11.3)                        | <i>ns</i>       | 52.0 (16.4)               | 46.9 (15.0)                     |
